# Supplementary material for: Enhancement of the catalytic performance of a CNT supported Pt nanorod cluster catalyst by controlling their microstructure
Source: Royal Society of Chemistry journal article supplement (doi:10.1039/c5ra13373d), 2015-01-01
Supplement: c5ra13373d2.pdf [file c5ra13373d2.pdf]

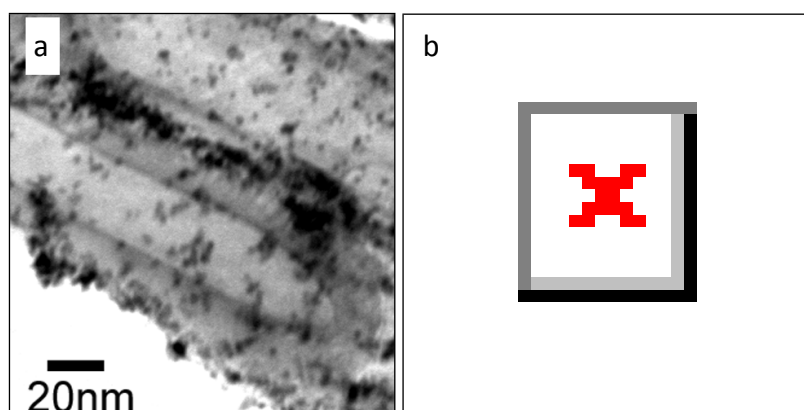

Figure S1. TEM bright field micrographs of TKCNT/ Pt prepared at different time (a) 12h and (b) 36h.

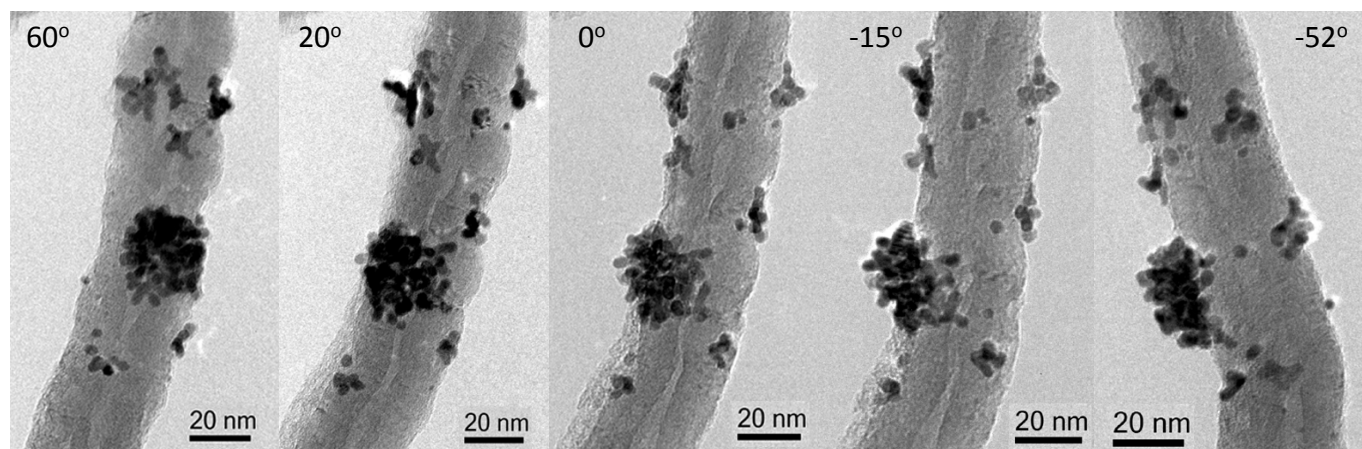

Figure S2. Selected bright field images of TEM tilt series obtained by tilting the TNCNT/ Pt sample to different angles: +60°, +20°, 0°, -15° and -52°.
